# Supplementary material for: Insight into the melt-processed polylimonene oxide/polylactic acid blends
Source: Royal Society of Chemistry journal article supplement (doi:10.1039/d3py00667k), 2023-01-01
Supplement: d3py00667k1.pdf [file d3py00667k1.pdf]

## Supporting Information

# Insight into the melt processed Polylimonene oxide/Polylactic acid blends

Miguel Palenzuela,<sup>a</sup> Juan F. Vega,<sup>b,c</sup> Virginia Souza-Egipsy,<sup>b</sup> Javier Ramos,<sup>b,c</sup> Christian Rentero,<sup>a</sup> Sessini Valentina<sup>a\*</sup> and Marta E. G. Mosquera<sup>a\*</sup>

<sup>a</sup>Departamento de Química Orgánica y Química Inorgánica, Instituto de Investigación Química "Andrés M. del Río". Campus Universitario, E-28871 Alcalá de Henares, Spain.

<sup>b</sup>BIOPHYM, Departamento de Física Macromolecular, Instituto de Estructura de la Materia, IEM-CSIC, c/Serrano 113 bis, 28006 Madrid, Spain.

<sup>c</sup>Interdisciplinary Platform for Sustainable Plastics towards a Circular Economy, SUSPLAST-CSIC, 28006 Madrid, Spain.

Corresponding Author e-mail: [valentina.sessini@uah.es](mailto:valentina.sessini@uah.es), [martaeg.mosquera@uah.es](mailto:martaeg.mosquera@uah.es)

## **CONTENTS**

- 1. Characterization of LO rearrangement products by GC-MS**
- 2. NMR spectra**
- 3. Isothermal TGA**

# 1. Characterization of LO rearrangement products by GC-MS

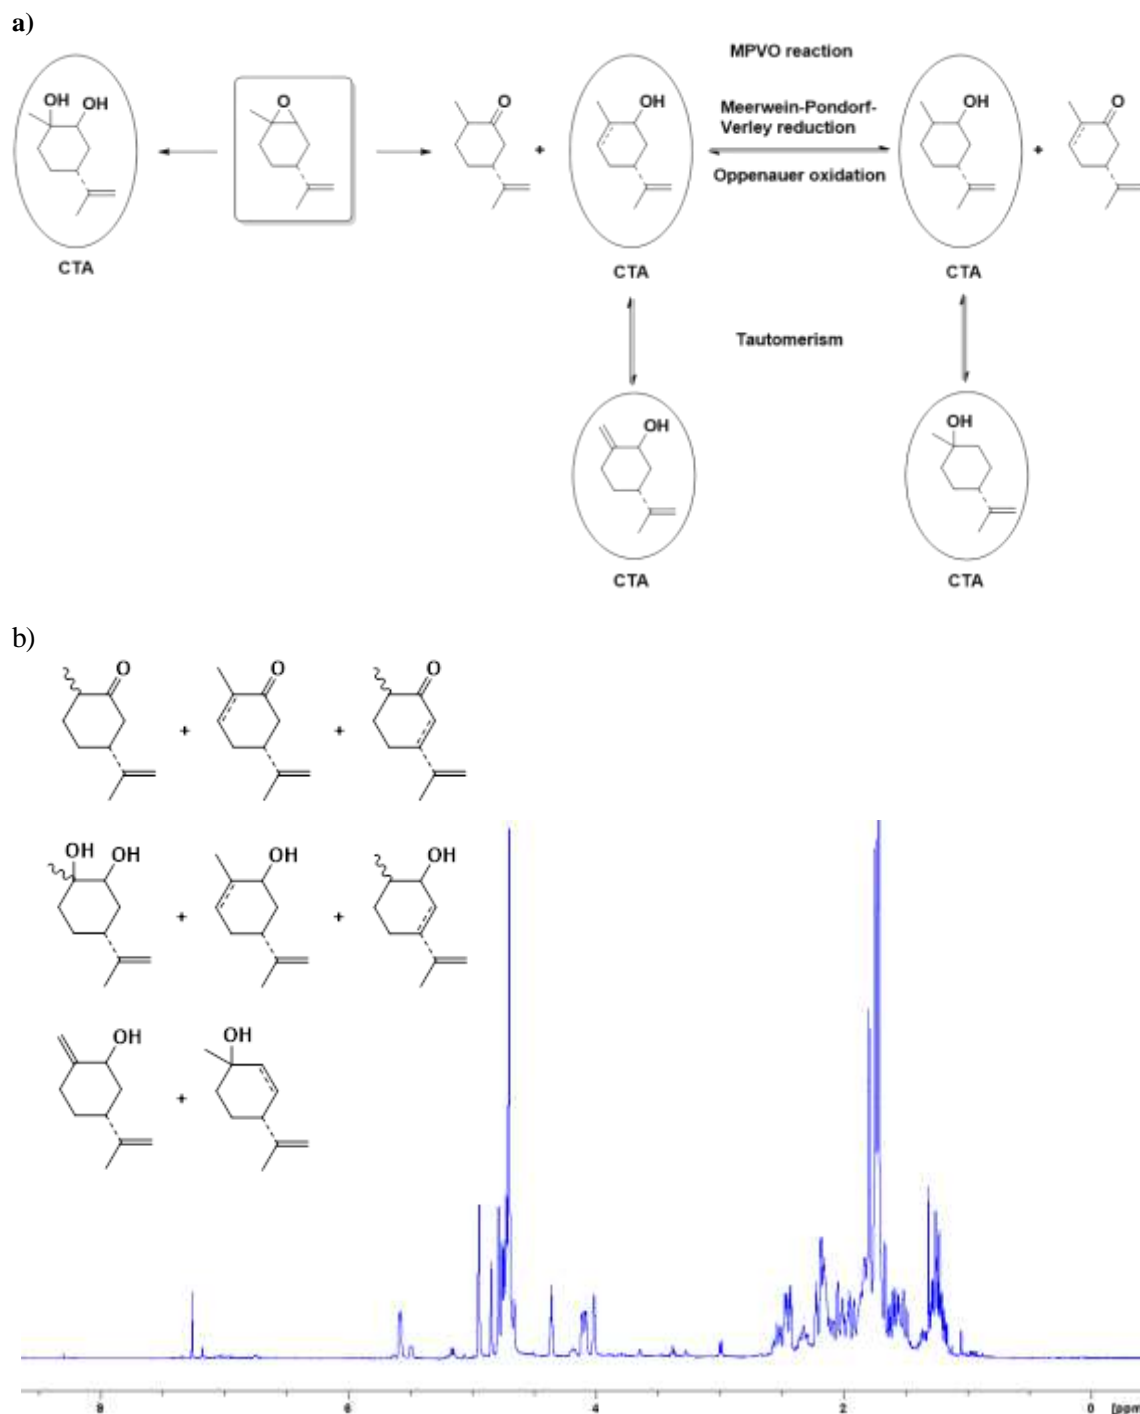

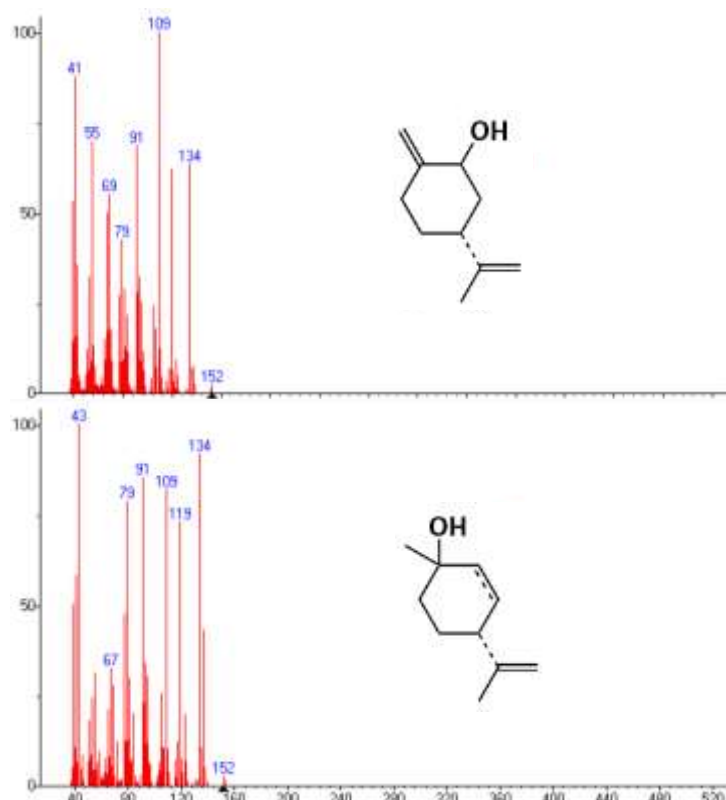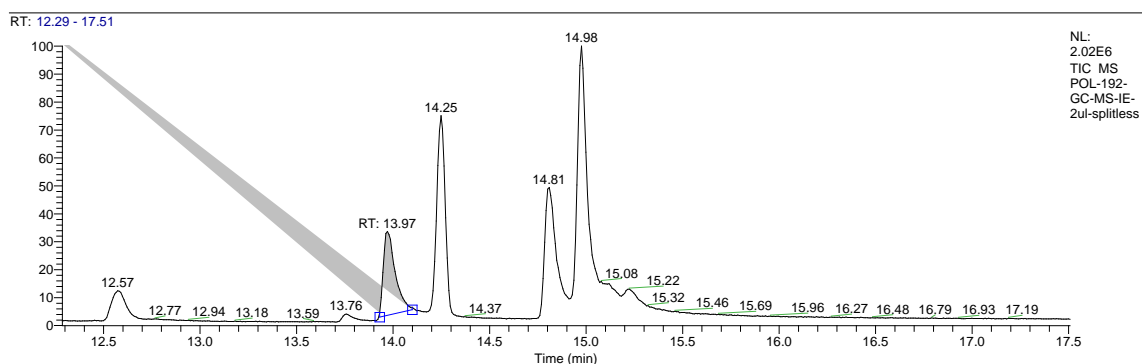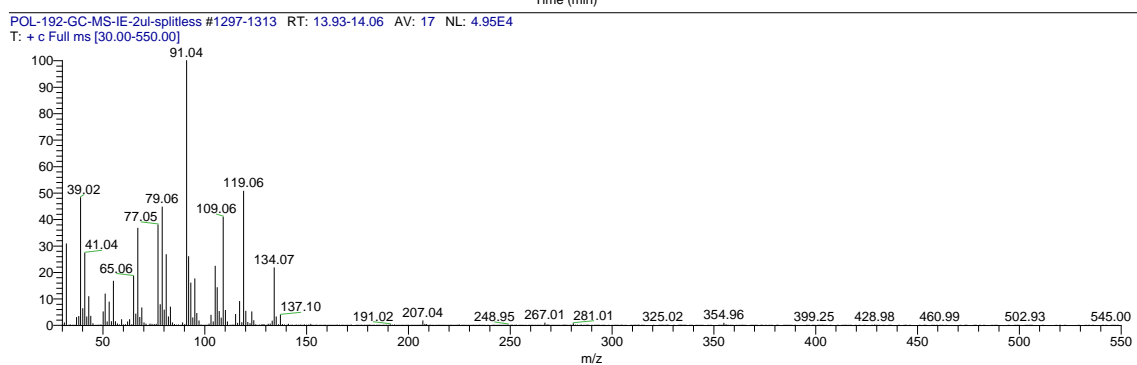

**Figure S2.** GC-MS of LO alcohol derivatives present in the filtrate of the ROP reaction of LO with catalysts **1**.

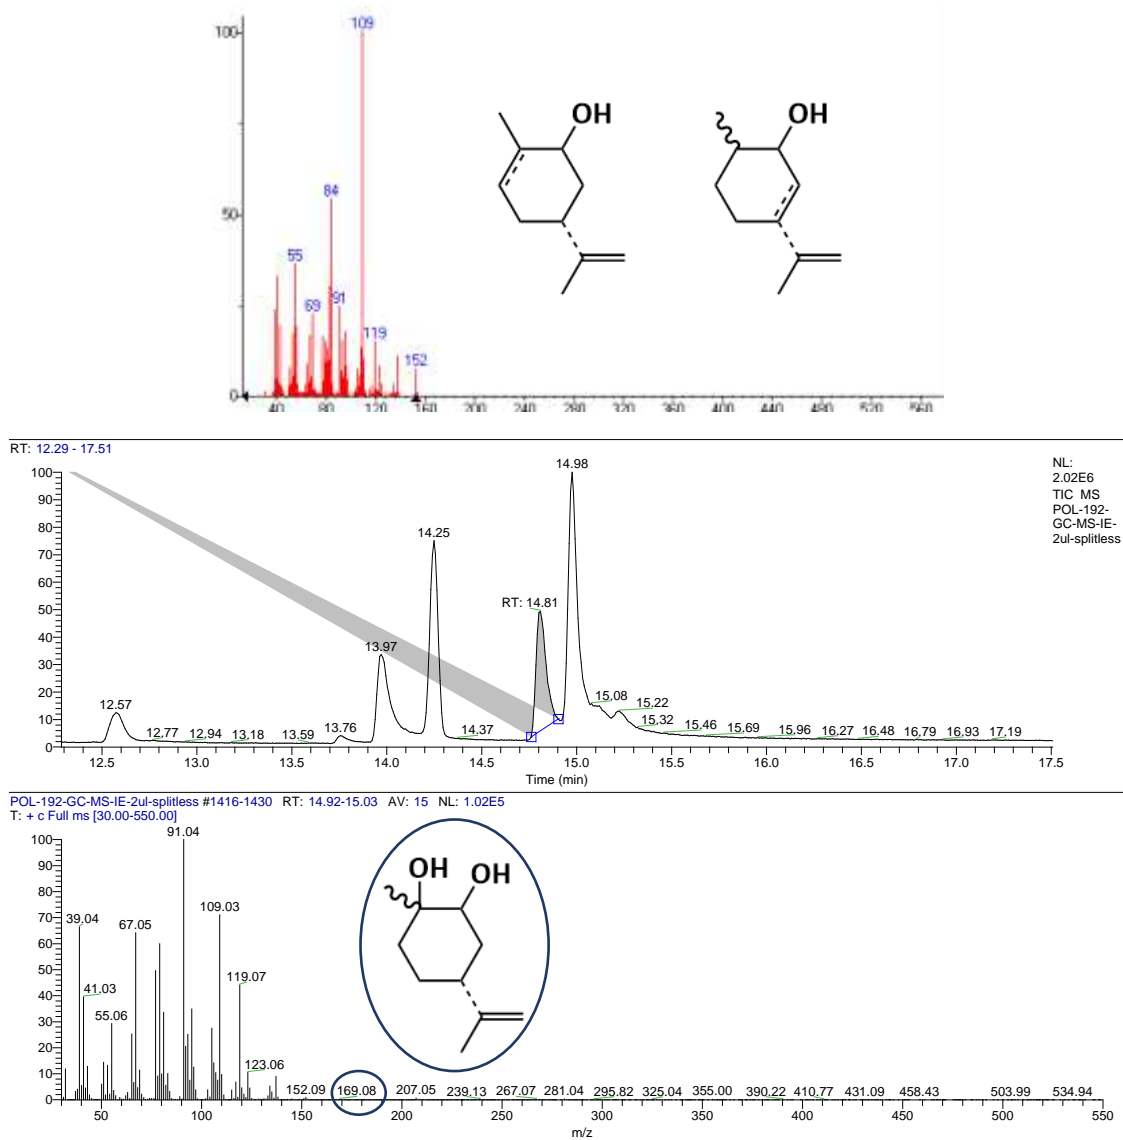

**Figure S3.** GC-MS of LO alcohol derivatives present in the filtrate of the ROP reaction of LO with catalysts **1**.

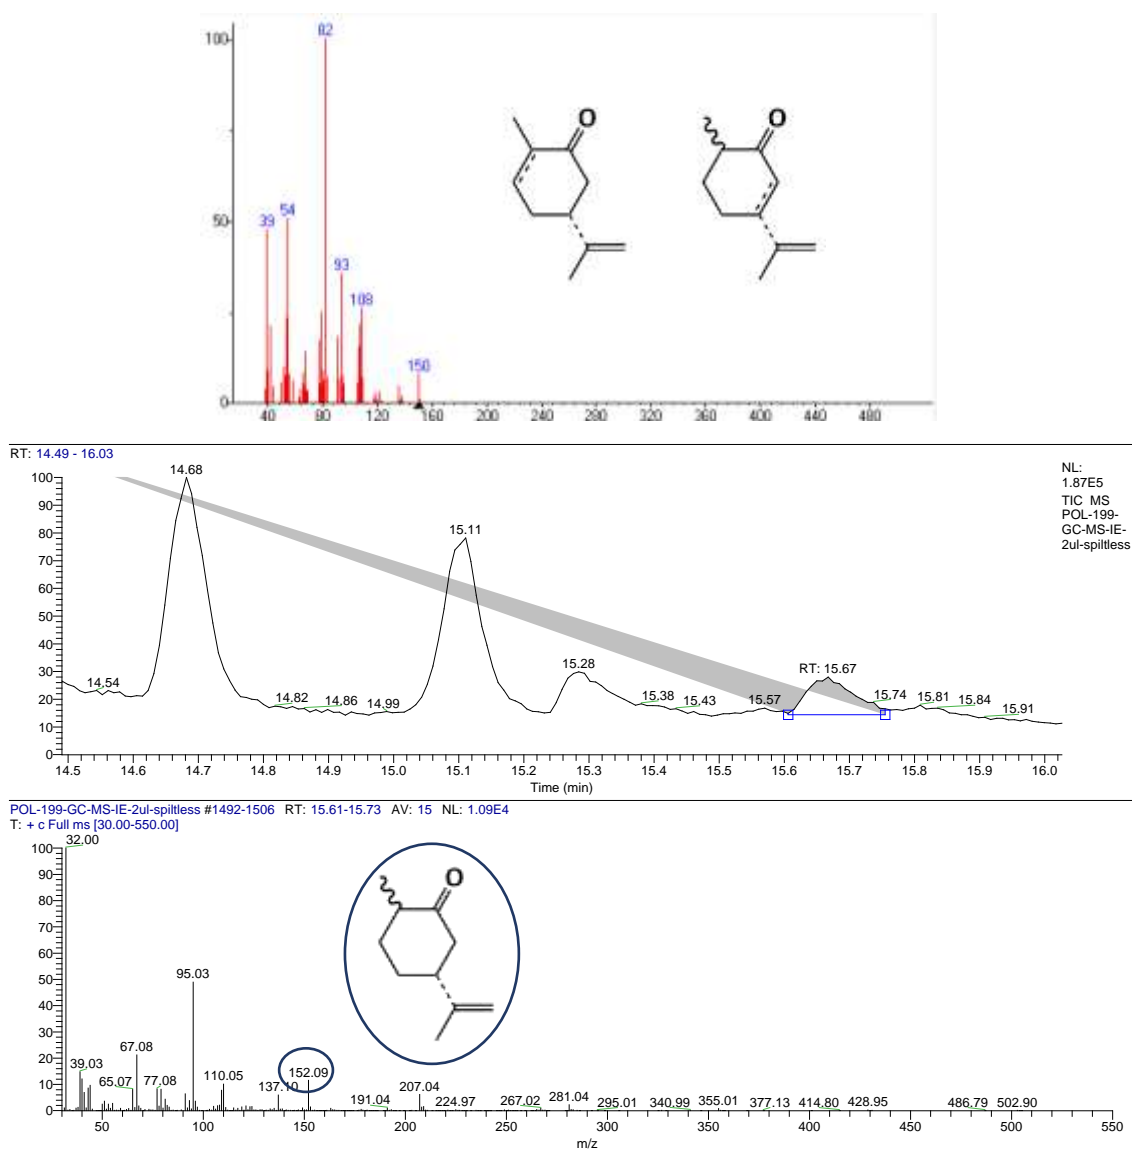

**Figure S4.** GC-MS of LO ketone derivatives present in the filtrate of the ROP reaction of LO with catalysts **1**.

## 2. NMR spectra

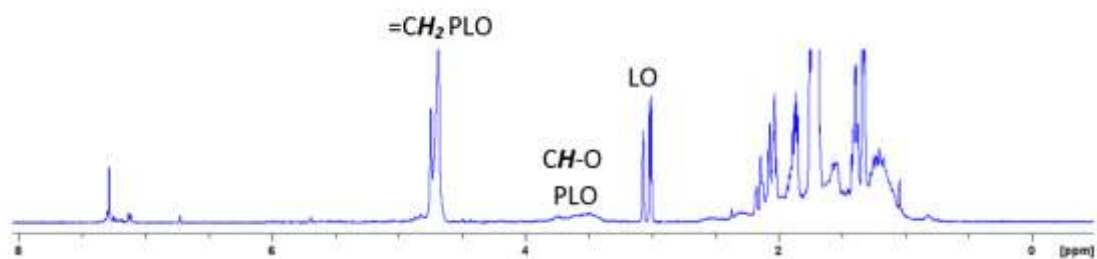

**Figure S5.** <sup>1</sup>H-NMR spectrum of an aliquot of the reaction of 250 equivalents of LO in bulk at RT.

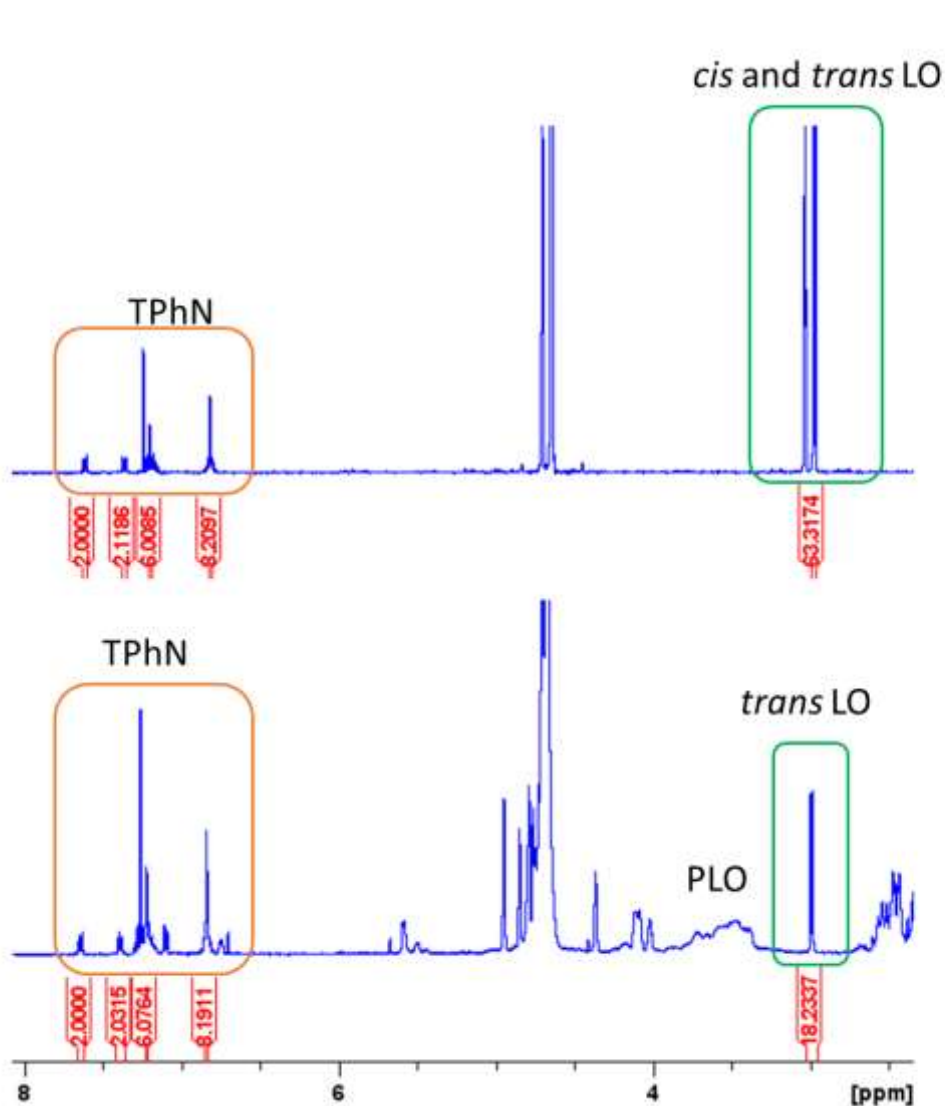

**Figure S6.** <sup>1</sup>H-NMR spectra in CDCl<sub>3</sub> of the reaction carried out with a [Al]:TPhN:LO ratio of 1:2:250 in bulk at 130 °C. (Top: before addition of catalyst; bottom: t=30 min)

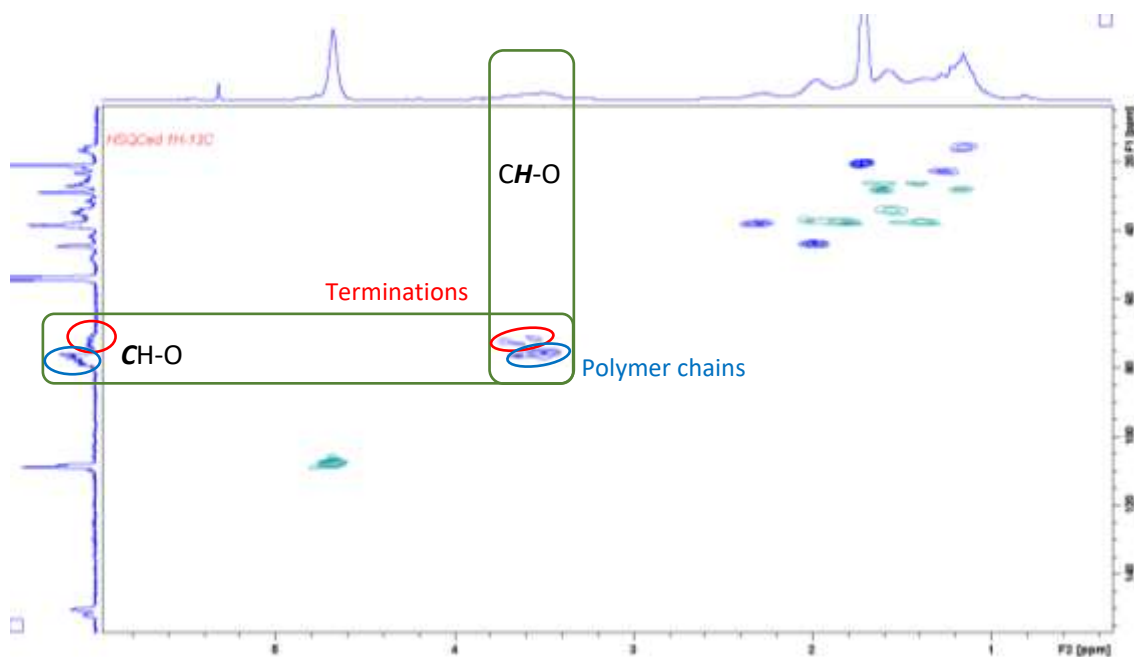

**Figure S7.** HSQCed  $^1\text{H}$ - $^{13}\text{C}$ -NMR spectrum of PLO ( $\text{CD}_2\text{Cl}_2$ , 400 MHz, RT).

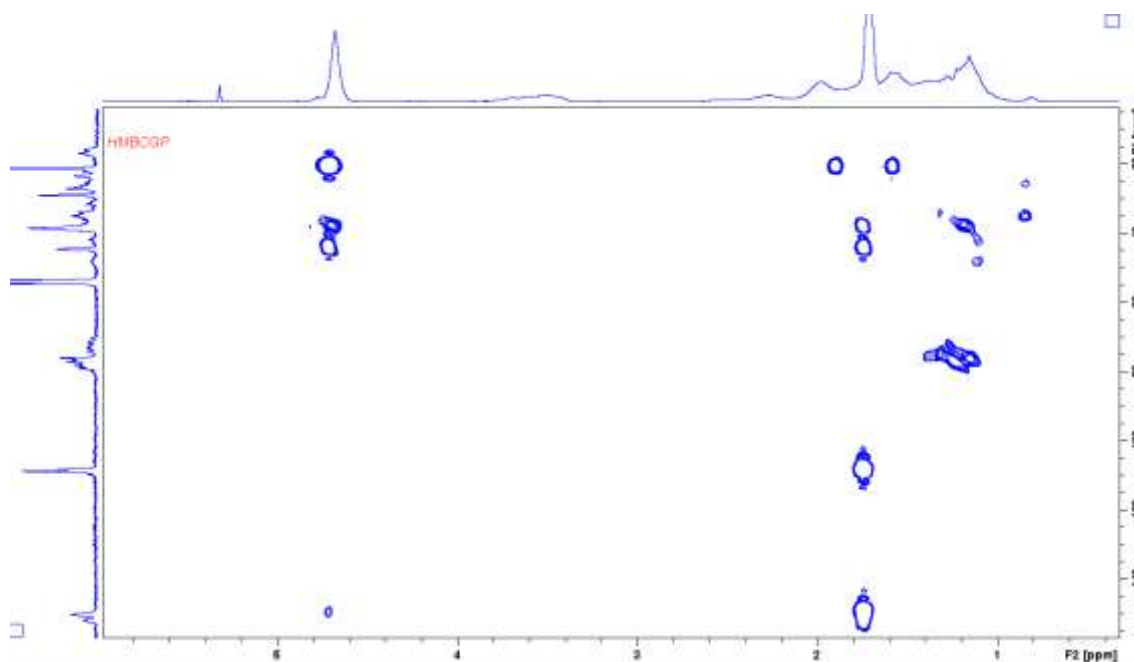

**Figure S8.** HMBC  $^1\text{H}$ - $^{13}\text{C}$ -NMR spectrum of PLO ( $\text{CD}_2\text{Cl}_2$ , 400 MHz, RT)



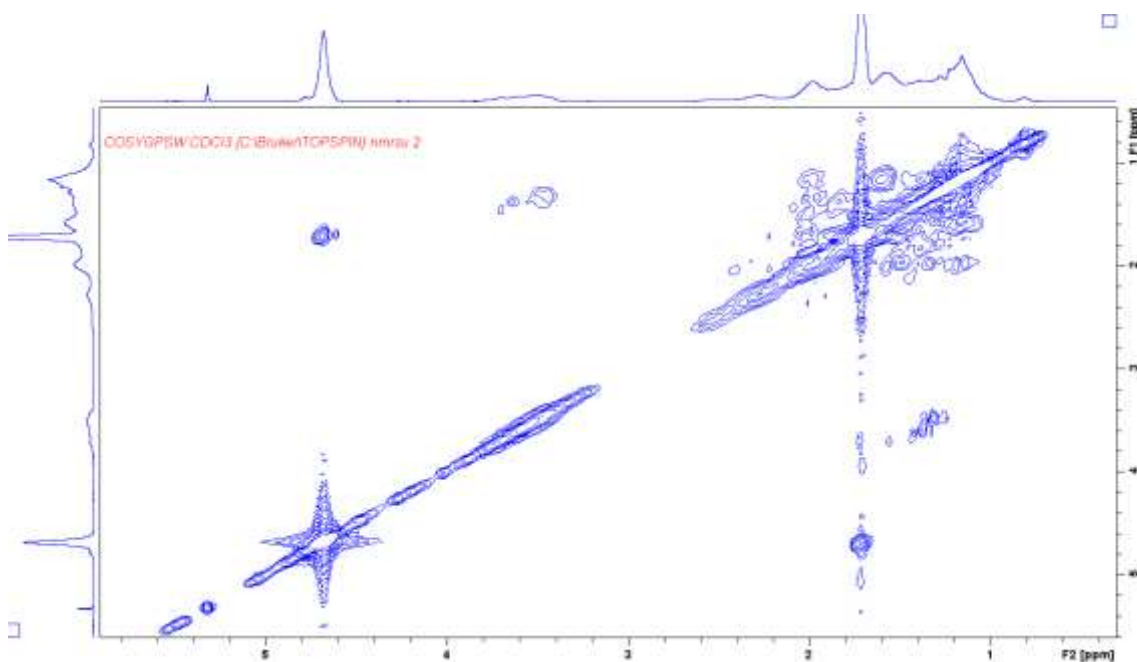

**Figure S9.** COSY  $^1\text{H}$ - $^1\text{H}$ -NMR spectrum of PLO ( $\text{CD}_2\text{Cl}_2$ , 400 MHz, RT).

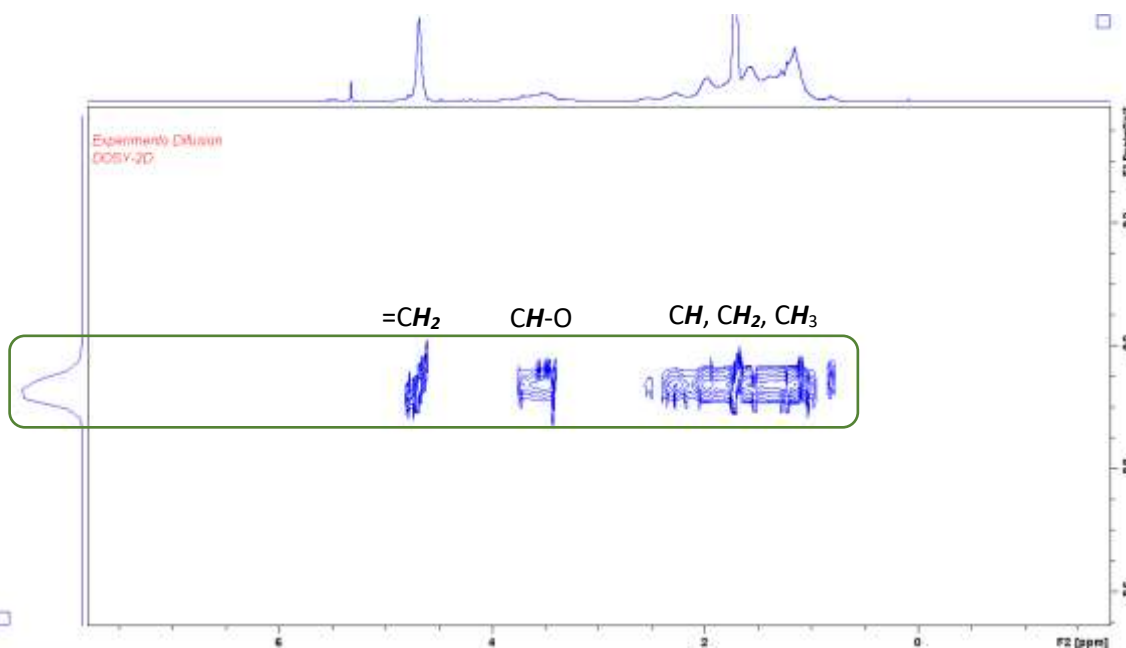

**Figure S10.** DOSY 2D NMR spectrum of PLO ( $\text{CD}_2\text{Cl}_2$ , 400 MHz, RT).

**Table S1.** Experiments of ROP of LO with catalysts 1 and 2.

| Ent. | [Al] | [Al]:[LO] | T (°C) | %Conv.<br>cis/trans-LO <sup>a</sup> | % Yield PLO |
|------|------|-----------|--------|-------------------------------------|-------------|
| 1    | 1    | 1:100     | 130    | >99 / 70                            | 28          |
| 2    | 1    | 1:100     | 25     | 94 / 83                             | 54          |
| 3    | 1    | 1:250     | 130    | >99 / 70                            | 28          |
| 4    | 1    | 1:250     | 25     | 80 / 67                             | 60          |
| 5    | 2    | 1:100     | 130    | >99 / 70                            | 28          |
| 6    | 2    | 1:100     | 25     | 91 / 78                             | 60          |
| 7    | 2    | 1:250     | 130    | >99 / 70                            | 28          |
| 8    | 2    | 1:250     | 25     | 77 / 62                             | 58          |

<sup>a</sup> Determined by <sup>1</sup>H-NMR spectroscopy.

### 3. GPC traces of polymers

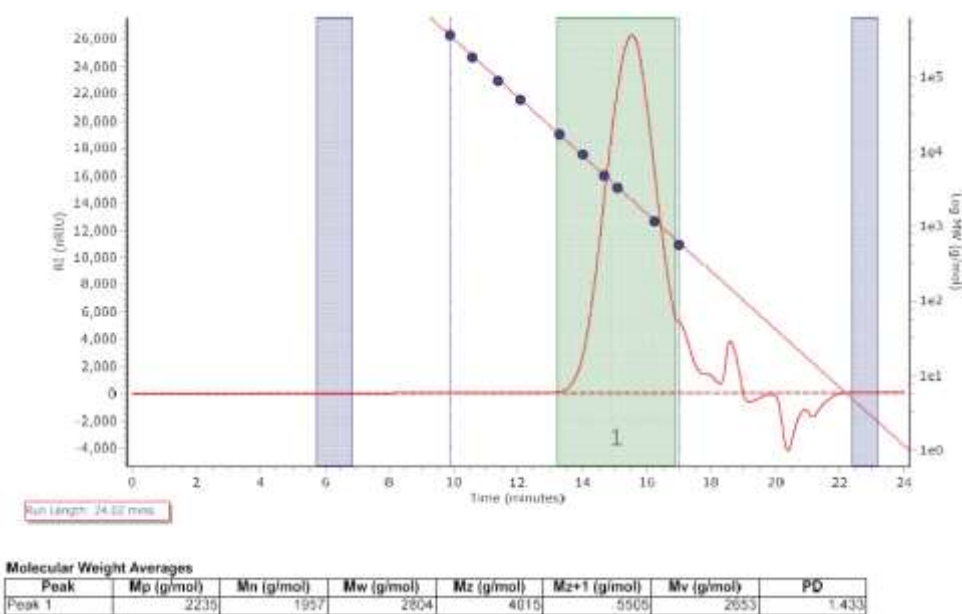

**Figure S11.** GPC traces of PLO obtained with **1** at RT

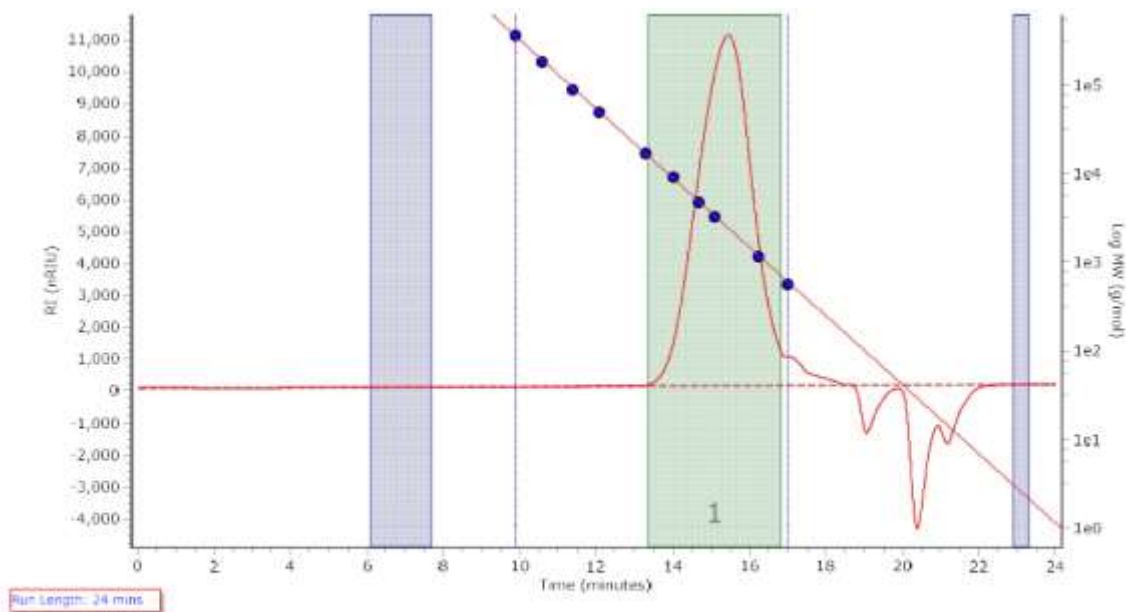

**Molecular Weight Averages**

| Peak   | Mp (g/mol) | Mn (g/mol) | Mw (g/mol) | Mz (g/mol) | Mz+1 (g/mol) | Mv (g/mol) | PD    |
|--------|------------|------------|------------|------------|--------------|------------|-------|
| Peak 1 | 2415       | 2265       | 3112       | 4257       | 5612         | 2965       | 1.374 |

**Figure S12.** GPC traces of PLO obtained with **2** at RT

**4. Isothermal analysis under air atmosphere**

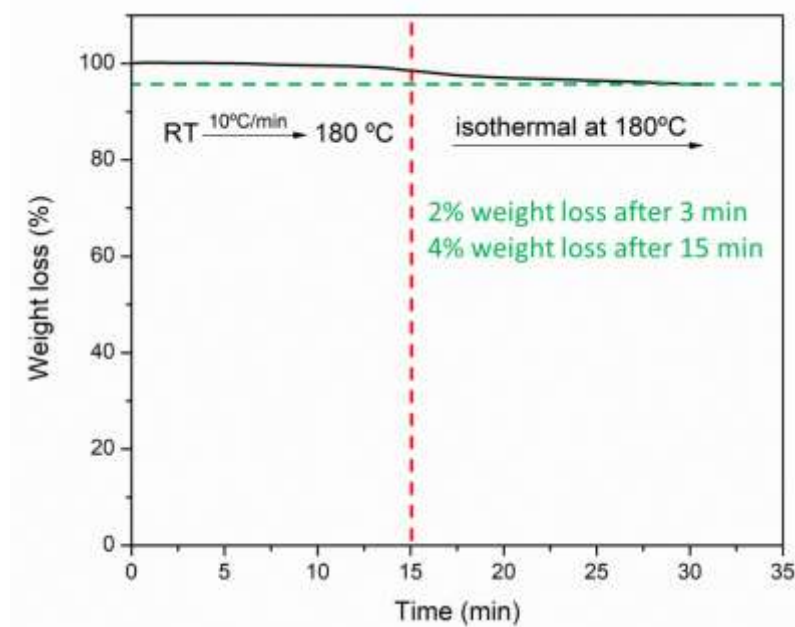

**Figure S13.** Isothermal TGA scan at 180°C under air flow.
